# Supplementary material for: Impact of Hydrostatic Pressure Variations Caused by Height Differences in Supine and Prone Positions on Fractional Flow Reserve Values in the Coronary Circulation
Source: J Interv Cardiol. 2019 Sep 2;2019:4532862. doi: 10.1155/2019/4532862 (PMC6766341; doi:10.1155/2019/4532862)
Supplement: Supplementary Materials — The supplementary material file contains the data of patient characteristics, lesion characteristics, and height differences between distal pressure sensor and catheter tip on CT. COPD, chronic obstructive pulmonary disease; EF, ejection fraction; PCI, percutaneous coronary intervention; CABG, coronary artery bypass graft LAD, left anterior descending artery; LCX, left circumflex artery: RCA, right coronary artery; AP, angina pectoris; OMI, old myocardial infarction; SMI, silent myocardial ischemia. [file 4532862.f1.xlsx]

## Sheet: Sheet1
sex	age	Hypertension	Diabetes mellitus	Dyslipidemia	smoking	Family history	Chronic kidney disease	Hemodialysis	Number of disease vessels	Old myocardial infarction	Congestive heart failure	Peripheral artery disease	COPD	Old cerebral infarction	previous PCI	previous CABG	EF	Antiplatelet agent	Anticoagulation	Beta-blocker	Renin-angiotensin system inhibitors	statin	Calcium channel blocker	Oral diabetes drugs	Insulin	Disgnosis	lesion	type	CT height difference(mm)	supine resting Pa	supine resting Pd	supine resting Pd/Pa	corrected supine resting Pd/Pa	supine hyperemia Pa	supine hyperemia Pd	supine FFR	corrected supine FFR	prone resting Pa	prone resting Pd	prone resting Pd/Pa	corrected resting Pd/Pa	prone hyperemia Pa	prone hyperemia Pd	prone FFR	corrected prone FFR
M	60	+	+	+	-	-	+	-	1	+	-	-	-	-	+	-	34.2	+	+	+	+	+	-	-	+	SMI	LCX	B1	39	102	107	1.05	1.02	83	81	0.98	0.94	115	111	0.96	0.99	106	95	0.9	0.92
M	81	+	+	-	-	-	+	-	2	-	-	-	-	-	-	-	74.1	-	-	-	+	+	-	-	-	AP	LCX	B2	11	84	78	0.93	0.92	57	49	0.86	0.84	84	76	0.9	0.92	68	56	0.82	0.84
M	66	+	+	+	-	-	-	-	2	-	-	-	-	+	-	-	73	+	-	-	-	+	+	+	-	SMI	LCX	A	28	98	96	0.98	0.96	81	75	0.93	0.9	95	93	0.98	1	92	81	0.89	0.9
M	48	+	-	-	-	-	-	-	2	-	-	-	-	-	-	-	54.4	-	-	-	+	-	-	-	-	SMI	RCA	A	18	151	148	0.98	0.97	158	119	0.75	0.75	197	181	0.92	0.92	178	135	0.76	0.76
M	63	-	-	-	-	-	-	-	1	+	-	-	-	-	-	-	59.1	-	-	+	-	-	-	-	-	AP	LCX	B2	38	74	75	1.01	0.97	74	61	0.82	0.78	96	87	0.91	0.94	89	65	0.73	0.76
M	59	+	-	+	+	-	+	-	1	+	+	-	-	-	-	-	39	+	-	+	+	+	-	-	-	AP	LAD	B1	33	93	83	0.89	0.92	83	64	0.77	0.81	105	100	0.95	0.92	99	82	0.83	0.8
M	67	+	-	+	-	-	-	-	2	+	-	-	-	-	-	-	52.7	+	-	-	-	+	+	-	-	SMI	LAD	B1	46	92	85	0.92	0.97	76	63	0.83	0.88	102	102	1	0.96	90	83	0.92	0.88
M	54	+	-	+	-	-	-	-	1	-	-	-	-	-	+	-	79.4	+	-	-	+	+	+	-	-	SMI	LAD	B2	50	67	55	0.82	0.88	75	49	0.65	0.71	66	61	0.92	0.86	58	43	0.74	0.67
M	62	-	+	+	+	-	-	-	1	-	-	-	-	-	+	-	78.3	-	-	-	-	-	-	+	-	SMI	LAD	A	68	78	73	0.94	1	70	54	0.77	0.84	83	86	1.04	0.98	74	66	0.89	0.82
F	67	+	-	-	-	-	-	-	1	-	-	-	-	-	-	-	67.6	-	-	-	-	-	-	-	-	SMI	LAD	A	35	138	121	0.88	0.9	136	83	0.61	0.63	132	119	0.9	0.88	127	84	0.66	0.64
M	84	+	+	+	-	-	-	-	2	+	-	-	-	-	+	-	72.9	+	-	-	+	+	+	-	-	SMI	LAD	B1	35	92	81	0.88	0.91	84	65	0.77	0.81	98	94	0.96	0.93	69	60	0.87	0.83
M	84	+	+	+	-	-	-	-	2	+	-	-	-	-	+	-	72.9	+	-	-	+	+	+	-	-	OMI	RCA	B1	45	93	90	0.97	0.94	72	59	0.82	0.78	97	85	0.88	0.91	73	55	0.75	0.79
M	61	+	+	+	-	-	-	-	1	+	-	-	-	-	+	-	56.7	+	-	+	+	+	-	+	-	OMI	LAD	C	70	98	88	0.9	0.95	79	63	0.8	0.86	96	97	1.01	0.96	96	88	0.92	0.86
M	61	+	+	+	-	-	-	-	1	+	-	-	-	-	+	-	56.7	+	-	+	+	+	-	+	-	AP	LCX	B1	21	82	80	0.98	0.95	83	74	0.89	0.87	101	94	0.93	0.95	93	78	0.84	0.86
M	66	+	+	-	-	-	-	-	2	-	-	-	-	-	+	-	58.4	+	-	+	+	+	+	-	-	SMI	RCA	A	35	76	75	0.99	0.95	57	47	0.82	0.77	91	78	0.86	0.89	71	49	0.69	0.73
F	65	-	-	+	-	-	-	-	2	-	-	-	-	-	-	-	64.6	-	-	-	-	+	-	-	-	AP	LAD	A	41	103	83	0.81	0.83	91	64	0.7	0.74	135	121	0.9	0.87	116	85	0.73	0.71
F	65	-	-	+	-	-	-	-	2	-	-	-	-	-	-	-	64.6	-	-	-	-	+	-	-	-	AP	LCX	A	19	111	107	0.96	0.95	88	79	0.9	0.88	148	136	0.92	0.93	121	103	0.85	0.87
M	56	-	-	+	-	-	-	-	1	-	-	-	-	-	-	-	71.9	-	-	-	-	-	-	-	-	AP	LAD	A	47	86	80	0.93	0.98	78	54	0.69	0.74	87	87	1	0.95	85	67	0.79	0.74
M	63	-	-	+	+	-	-	-	2	-	-	-	-	-	-	-	53.6	-	-	-	-	-	-	-	-	AP	LCX	A	21	95	93	0.98	0.96	81	72	0.89	0.86	77	71	0.92	0.95	78	65	0.83	0.86
M	58	-	-	-	-	-	-	-	0	-	-	-	-	-	-	-	64.7	-	-	-	-	-	-	-	-	AP	LAD	A	31	89	80	0.9	0.92	87	60	0.69	0.71	87	85	0.98	0.95	86	63	0.73	0.71
M	49	+	+	-	+	+	-	-	2	+	-	-	-	-	-	+	58.8	+	-	-	-	-	-	-	-	AP	LCX	B1	20	118	112	0.95	0.93	96	83	0.86	0.84	116	104	0.9	0.91	104	83	0.8	0.82
M	64	-	-	+	+	+	+	-	2	+	-	-	-	-	-	-	50.3	+	-	-	-	+	-	-	-	AP	RCA	B1	32	81	81	1	0.96	73	63	0.86	0.82	87	82	0.94	0.98	71	55	0.77	0.82
M	74	-	-	-	-	-	-	-	1	+	-	-	-	-	+	-	67.1	+	-	-	-	+	-	-	-	SMI	RCA	B1	25	98	99	1.01	0.99	81	78	0.96	0.94	94	90	0.96	0.98	92	84	0.91	0.93
F	82	+	-	-	-	-	-	-	1	-	-	-	-	-	-	-	56	+	-	+	+	+	-	-	-	AP	RCA	A	19	85	79	0.93	0.91	87	72	0.83	0.8	92	83	0.9	0.92	103	79	0.77	0.79
M	67	+	-	-	-	-	-	-	2	-	-	-	-	-	-	-	66.5	+	-	-	+	-	+	-	-	AP	LCX	B1	18	116	115	0.99	0.98	95	83	0.87	0.86	127	122	0.96	0.97	119	102	0.86	0.87
M	67	+	-	-	-	-	-	-	2	-	-	-	-	-	-	-	66.5	+	-	-	+	-	+	-	-	AP	LAD	B2	71	109	96	0.88	0.94	90	61	0.68	0.74	125	123	0.98	0.94	122	98	0.8	0.75
F	74	-	-	-	-	-	-	-	2	+	-	-	-	-	+	+	85.8	+	+	-	-	+	-	-	-	SMI	LCX	B2	20	81	80	0.99	0.96	44	40	0.91	0.86	82	77	0.94	0.96	64	53	0.83	0.86
